# Supplementary material for: Polydiacetylenyl β-cyclodextrin based smart vesicles for colorimetric assay of arginine and lysine
Source: PubMed Central journal article supplement (PMC4977466; doi:10.1038/srep31115), 2016-08-09
Supplement: srep31115-s1.pdf [file srep31115-s1.pdf]

Supporting Information

# Polydiacetylenyl $\beta$ -cyclodextrin based smart vesicles for colorimetric assay of arginine and lysine

*Eunae Cho,<sup>1</sup> Hwanhee Kim,<sup>2</sup> Youngjin Choi,<sup>3</sup> Seung R. Paik,<sup>4</sup> Seunho Jung\*,<sup>1,2</sup>*

<sup>1</sup>Center for Biotechnology Research in UBITA (CBRU), Institute for Ubiquitous Information Technology and Applications (UBITA), Konkuk University, 120 Neungdong-ro, Gwangjin-gu, Seoul 05029, South Korea

<sup>2</sup>Department of Bioscience and Biotechnology, Microbial Carbohydrate Resource Bank (MCRB), Konkuk University, 120 Neungdong-ro, Gwangjin-gu, Seoul 05029, South Korea

<sup>3</sup>Departments of Food Science and Technology, BioChip Research Center, Hoseo University, 20, Hoseo-ro 79beon-gil, Baebang-eup, Asan-si, Chungcheongnam-do, 336-795, Korea

<sup>4</sup>School of Chemical and Biological Engineering, Institute of Chemical Processes, College of Engineering, Seoul National University, Seoul 151 744, South Korea

## $\beta$ -CD conjugated PDA vesicle for selective visualization of arginine (lysine)

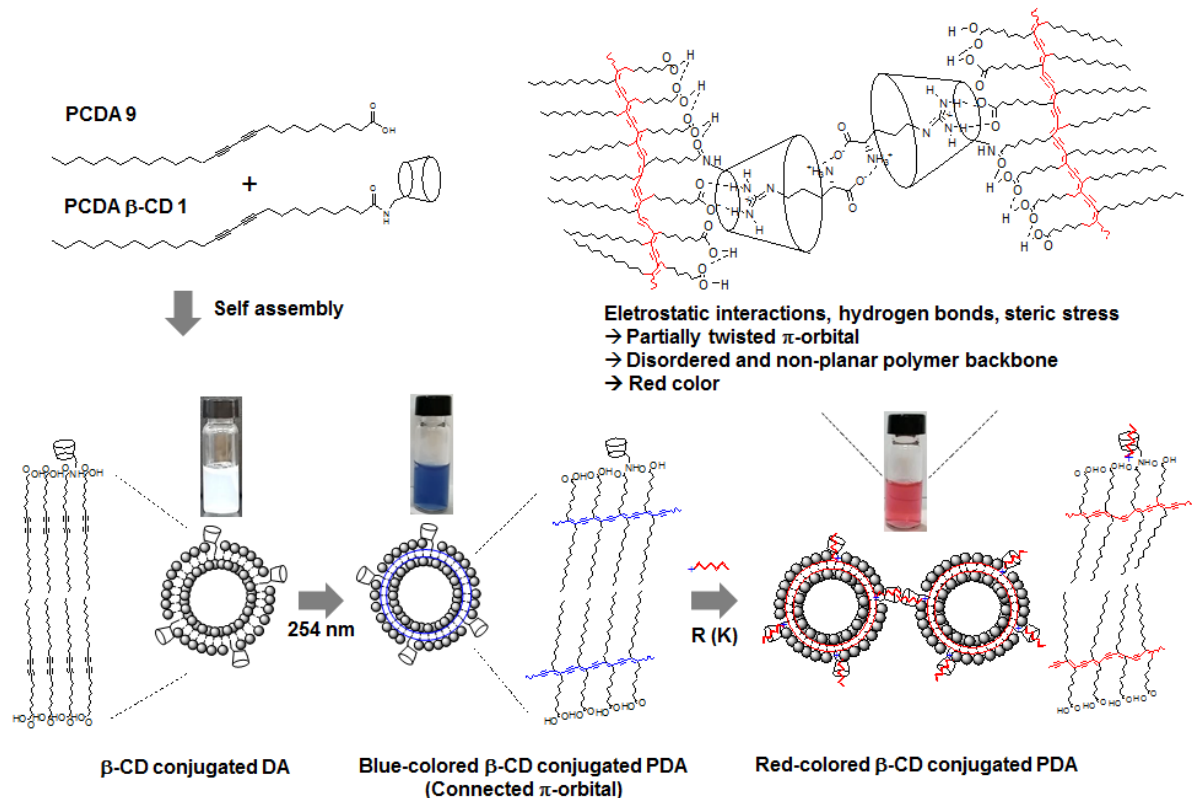

**Figure S1.** Self-assembly of PCDA  $\beta$ -CD and PCDA to form PDA vesicles and the schematic illustration of PDA vesicles for selective visualization of arginine (lysine).

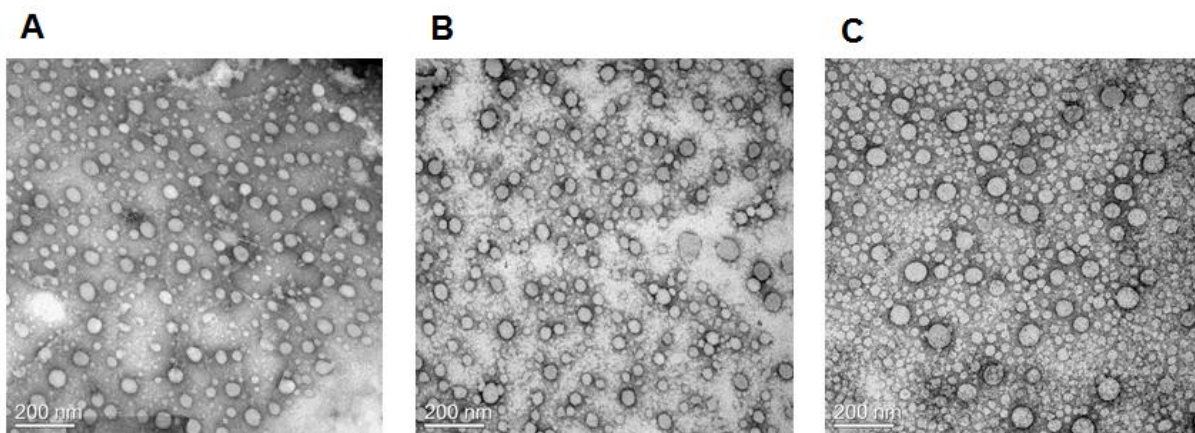

**Figure S2.** TEM images of original PDA (A) and  $\beta$ -CD conjugated PDAs (10% 6 PCD  $\beta$ -CD (B) and 10% 3 PCD  $\beta$ -CD (C)).

**Raman spectroscopy.** The vesicle solution was dropped onto a cover glass then dried. The raman spectra were recorded using Horiba Jobin-Yvon T64000 triple stage spectrograph.

**Fluorescence spectroscopy.** Fluorescence spectra were also taken using a spectrofluorophotometer (RF-5310PC, SHIMADZU). The probe was excited at 485 nm, and the emission spectra were measured in the range of 520-700 nm.

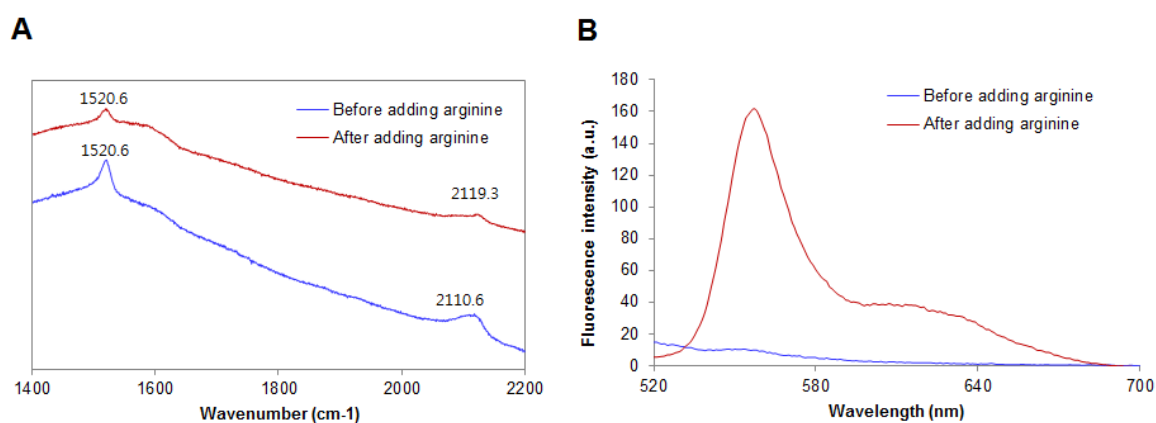

**Figure S3.** Raman scattering (A) and fluorescence spectra of  $\beta$ -CD conjugated PDAs (10% 6 PCD  $\beta$ -CD) before and after sensing.

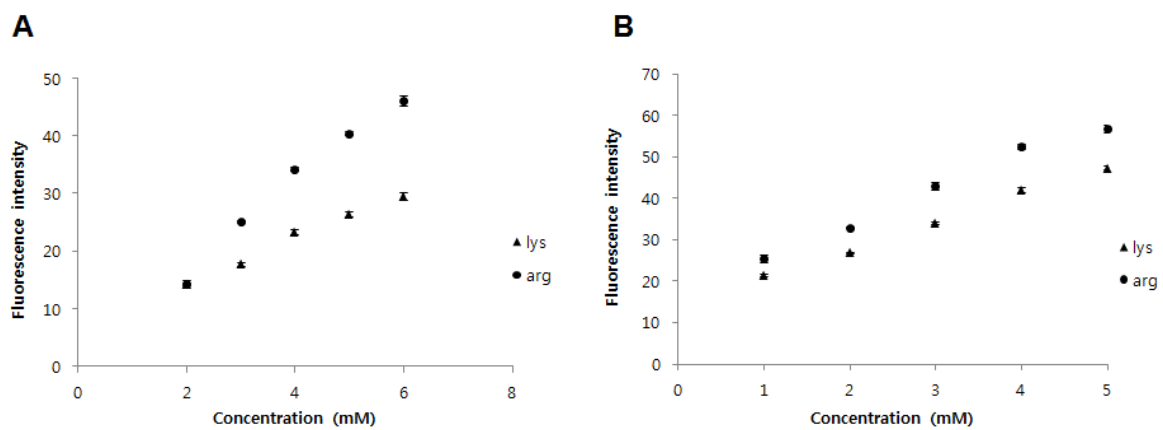

**Figure S4.** Correlation curve between the fluorescence intensity and the concentration of arginine or lysine in  $\beta$ -CD conjugated PDA with 6 PCD  $\beta$ -CD (A) and 3 PCD  $\beta$ -CD (B). All experiments were performed in triplicate.

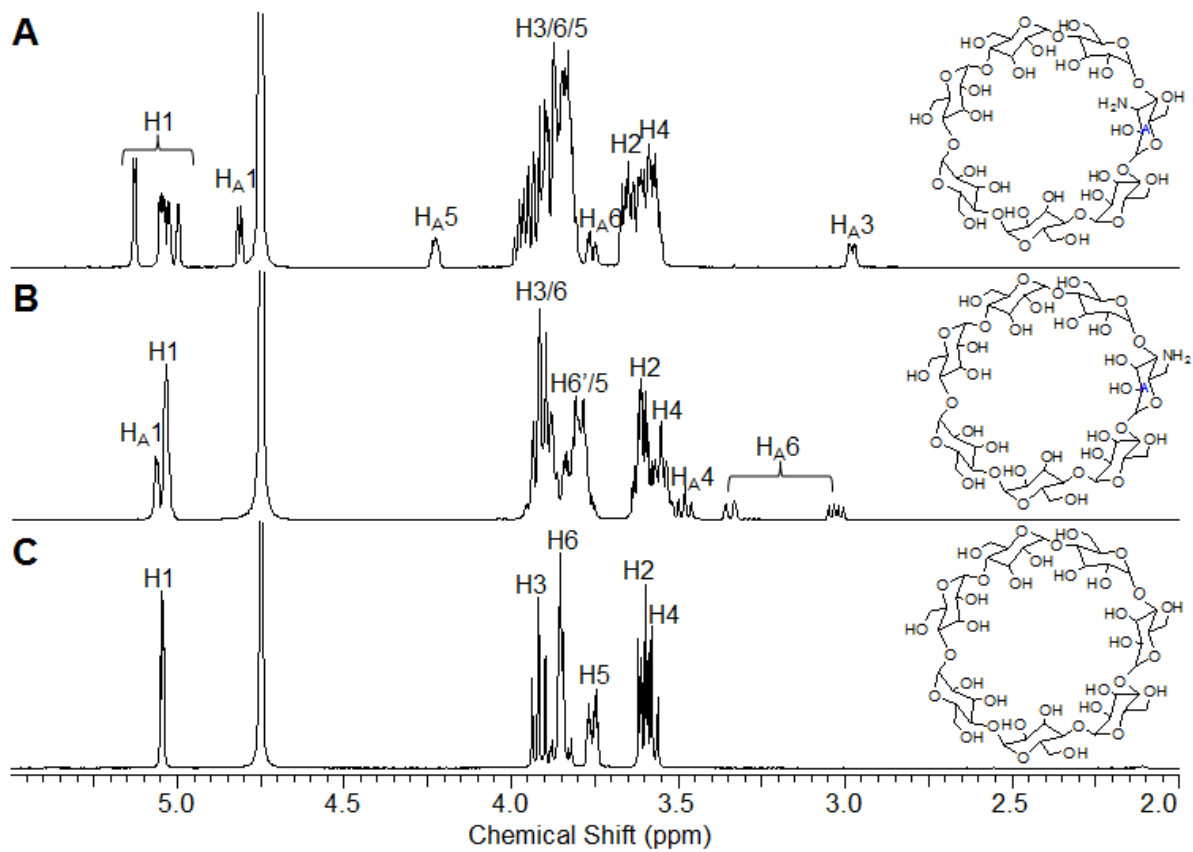

**Figure S5.**  $^1\text{H}$  NMR spectra of 3 amino  $\beta$ -CD (A), 6 amino  $\beta$ -CD (B), and unsubstituted  $\beta$ -CD (C). Solvent :  $\text{D}_2\text{O}$ . Inset shows the corresponding chemical structures.

**Nuclear magnetic resonance (NMR) spectroscopy.**

A Bruker Avance 500 spectrometer was used to

record NOESY spectra.

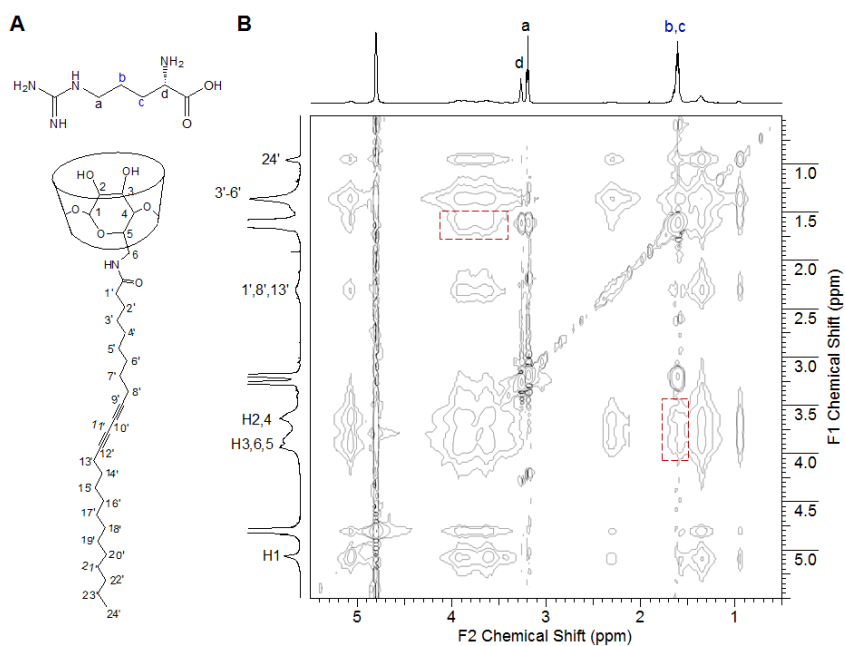

**Figure S6.** Partial NOESY spectrum of arginine/6 PCD  $\beta$ -CD in  $D_2O$  at 298 K with a mixing time of 800 ms.

The signals in the F1 and F2 chemical shift are attributed to 6 PCD  $\beta$ -CD and arginine, respectively.

## UV-Vis and fluorescence spectroscopy

UV-Vis spectra were obtained with a Shimadzu Corporation UV 2450, UV-Vis spectrophotometry. Fluorescence spectra were also taken using a spectrofluorophotometer (RF-5310PC, SHIMADZU).

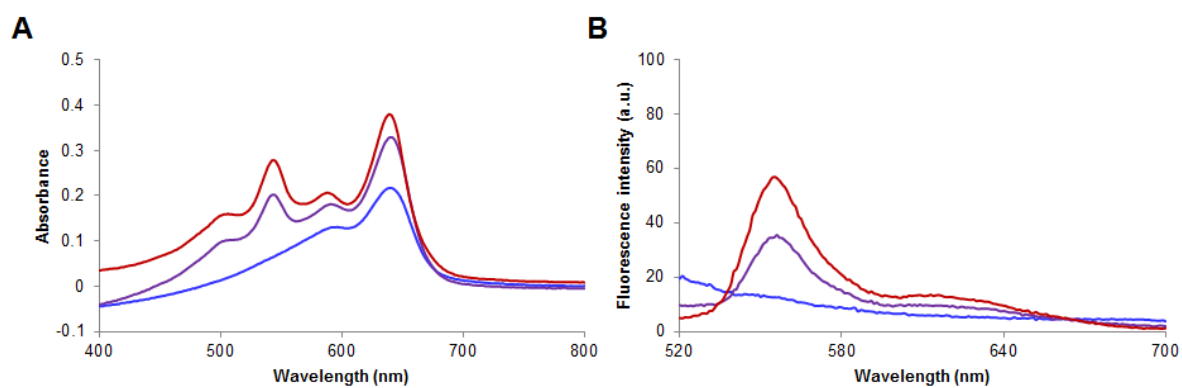

**Figure S7.** UV-Vis absorption (A) and fluorescence (B) spectra of  $\beta$ -CD conjugated PDA vesicles. (Blue line: 10% 6 PCD  $\beta$ -CD; Purple line: 20% 6 PCD  $\beta$ -CD; Red line : 40% 6 PCD  $\beta$ -CD)



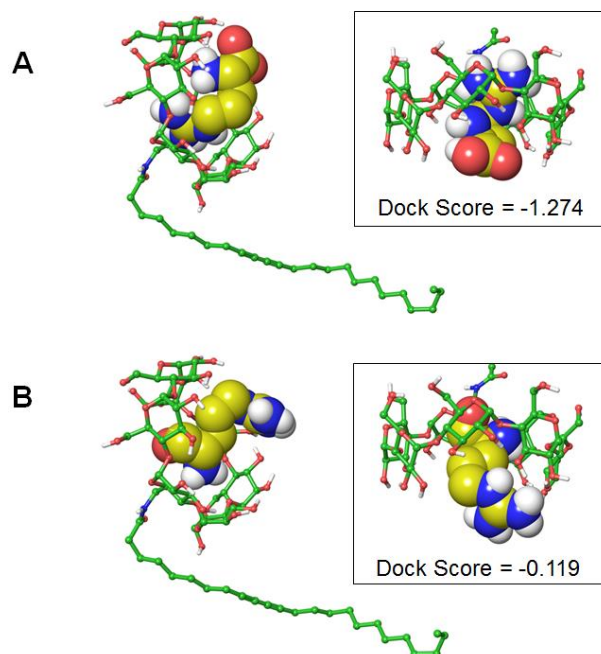

**Figure S8.** Two different binding modes of inclusion complex for the 6 PCD-β-CD with arginine. (A) guanidium-up, and (B) guanidium-down models were represented by combination of ball-and-stick (6 PCD-β-CD) and space-filling (arginine) rendering.

**Docking mode of arginine into 6 PCD-β-CD.** For the inclusion complex of 6 PCD-β-CD with arginine, two different binding modes were possible based on side-chain orientation of the arginine; guanidium-up and guanidium-down structures toward primary face of 6 PCD-β-CD. The amino- and carboxylic acid groups of arginine should be oriented to secondary face for the case of guanidium-up structure by definition. For the guanidium-down structure, carboxylic acid group should be oriented to primary face according to same logic. From docking simulation of 6 PCD-β-CD with arginine, the Glide docking score of each guanidium-up and guanidium-down complex was to be -1.274 and -0.119 kcal/mol, respectively. The guanidium-up structure was more stable by 1.155 kcal/mol compared to their downward counterpart. Fig. S8 is snapshot images for the highest-scoring docked pose of both guanidium-up and guanidium-down complex with the 6 PCD-β-CD. Because of its docking score, the guanidium-up and carboxylic acid-down structure of arginine is only considerable to state a theoretical hypothesis on the interaction mode of arginine in the cavity of 6 PCD-β-CD. Therefore the carboxyl moiety should be located on the secondary face of the 6 PCD-β-CD.
